# Supplementary material for: Engineering lead-sensing GFP through rational designing
Source: Royal Society of Chemistry journal article supplement (doi:10.1039/c4cc07163h), 2014-01-01
Supplement: c4cc07163h1.pdf [file c4cc07163h1.pdf]

## Electronic Supporting Information

### Engineering lead-sensing GFP through rational designing

Saravanan Prabhu Nadarajan,<sup>a</sup> Ravikumar Yuvaraj,<sup>b</sup> Kanagavel Deepankumar,<sup>b</sup> Chong-Soon Lee,<sup>b</sup> and Hyungdon Yun<sup>\*a</sup>

<sup>a</sup> Department of Bioscience and Biotechnology, Konkuk University, Seoul, Korea.

Email: [hyungdon@konkuk.ac.kr](mailto:hyungdon@konkuk.ac.kr)

<sup>b</sup> School of Biotechnology, Yeungnam University, Gyeongsan, Gyeongbuk 712-749, Korea.

[\*] Corresponding author

## 1. Materials

PCR reagents, T4 DNA ligase and restriction endonucleases were purchased from Promega (Madison, WI, USA). The host bacterium *Escherichia coli* (*E. coli*) strain XL1-blue (Stratagene, CA, USA) was used for plasmid DNA preparation. Plasmids transformed in *E. coli* were grown aerobically in Luria-Bertani (LB) broth (Difco Laboratories, Detroit, Michigan, USA) or on LB agar plate, supplemented with appropriate antibiotics for the selection of transformants. The pQE-80L plasmid and nickelnitrilotriacetic acid (Ni-NTA) affinity column were purchased from Qiagen (Valencia, CA, USA). All the remaining chemicals isopropyl-D-thiogalactopyranoside (IPTG) were purchased from Sigma-Aldrich, Korea.

## 2. Construction of plasmids and strains

DNA manipulations were performed according to the procedures described earlier.<sup>[1]</sup> PCR reaction (50 µl) was carried out with 10 pM of each primer, 50 ng of template DNA, 1X Taq DNA polymerase buffer, 1U of *Taq* DNA polymerase (Promega, Madison, WI, USA), 0.2 mM of each deoxyribonucleotide triphosphates and 1.5 mM MgCl<sub>2</sub>. DNA amplification was performed in a DNA thermal cycler (Master gradient thermal cycler, Eppendorf, Hamburg, Germany) programmed for an initial denaturation (94°C for 1 min), followed by 30 cycles of chain reaction for 1 min at 94°C, 1 min at 60°C and 0.5 min at 72°C with an extension at 72°C for 10 min. GFP was amplified and cloned into pQE-80L. All the constructs were sequenced and confirmed for their target sequences.

## 3. Molecular modeling studies

### a) Lead binding pattern analysis

Initially, we analyzed the lead binding sites of the earlier reported crystal structures in PDB. We searched for a query "lead" in the PDB database and obtained the chemical name "lead, Pb<sup>2+</sup>". Here, we obtained 40 structures containing lead as free ligand. Among them, 4 structures were DNA and other 36 were protein structures. So we utilized the protein structure and analyzed the lead coordinating sites using PyMol tool.<sup>[2]</sup> Each protein structures contains one or more lead binding sites. We analysed the interaction with the residues and classified it into 6 different patterns. Proteins containing lead with no interaction with amino acid residues were ignored.

Table S1: Classification of lead binding patterns of protein structure and its lead coordinating residues

| Classified based on interaction | PDB ID | Amino acid coordinating lead                                |
|---------------------------------|--------|-------------------------------------------------------------|
| Class I                         | 1QNV   | Cys133, Cys135, Cys143, Ser179                              |
|                                 | 1IW7   | Cys11, Cys12, Cys58, Cys1112<br>/Cys58, Cys60, Cys73, Cys76 |
|                                 | 1IW7   | Cys58, Cys60/Cys60, Cys1204                                 |
| Class II                        | 1E9N   | Tyr171, His309, Asp210, Asn212                              |
|                                 | 1Na0   | Tyr99, Glu98                                                |
|                                 | 2EX3   | Glu14, Asp145, Asp169, Tyr148                               |

|                                            |      |                                        |
|--------------------------------------------|------|----------------------------------------|
| <b>Class III</b>                           | 1QR7 | Cys61, His268, Glu302, Asp326          |
| <b>Class IV</b>                            | 1KA4 | His269, His273, Glu299                 |
|                                            | 2FP1 | Glu38, Glu41, His151                   |
| <b>Class V</b>                             | 1E9N | ASP70, Glu96, Asp308                   |
|                                            | 1HD7 | ASP70, Glu96, Asp308                   |
|                                            | 1NoY | Glu2, Glu84, Glu87                     |
|                                            | 1ZHY | Glu204, Arg236 /Asp364                 |
|                                            | 1ZHZ | Glu204, Arg236 /Asp364                 |
|                                            | 2G0A | Asp49, Asp238, Asp242                  |
|                                            | 2V01 | Asp22, Asp20, Glu31, Asp24             |
|                                            | 3QJK | Asp10, Asp14, Glu21, Ala16             |
|                                            | 3QJK | Asp48, Asp46, Glu57, Glu52             |
|                                            | 3T8Y | Asp13, Glu60, Asp58                    |
|                                            | 3TWY | Asp187, Asp246, Asp193, Trp247, Asp248 |
|                                            | 1NoY | Glu11, Glu14                           |
|                                            | 1NA0 | Glu61, Glu64                           |
|                                            | 2CH7 | Glu506, Glu247                         |
|                                            | 2FJ9 | Asp69, Glu68                           |
|                                            | 2FP1 | Glu48, Glu51                           |
|                                            | 4H7X | Asp52, Glu75                           |
|                                            | 1HQJ | Asp2, Glu10                            |
|                                            | 2V01 | Glu67, Asn60, Thr62                    |
| <b>Class VI ( single amino acid bound)</b> | 1AFV | Glu83                                  |
|                                            | 1FJR | Glu90/ASP139                           |
|                                            | 1NoY | Glu7                                   |
|                                            | 1SN8 | Glu72                                  |
|                                            | 1SYV | Glu270                                 |
|                                            | 1XXA | Glu150                                 |
|                                            | 1ZHW | Asp364                                 |
|                                            | 2ANI | Glu270                                 |
|                                            | 2EX3 | Glu221/Asp169                          |
|                                            | 1V0D | Cys197                                 |
|                                            | 2oQ1 | Cys119                                 |

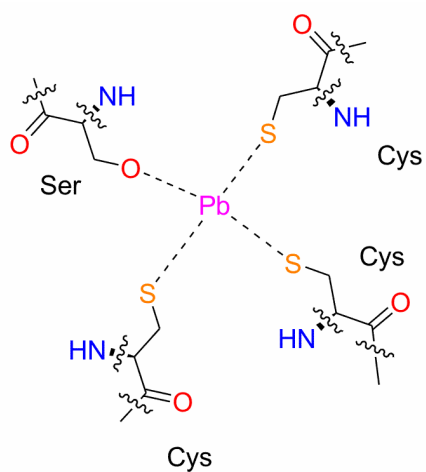

**Class I**  
For eg: PDB ID-1QNV

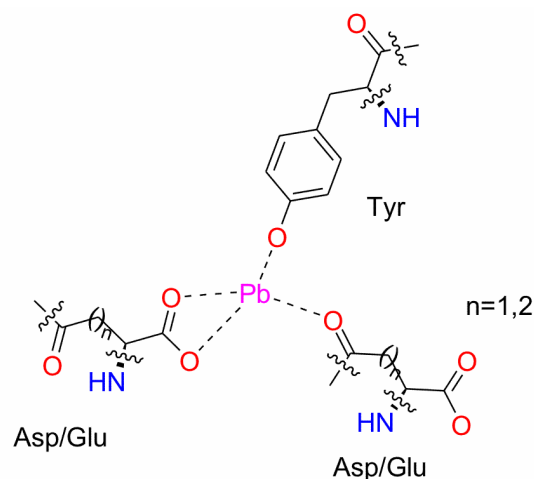

**Class II**  
For eg: PDB ID-1NA0,2EX3

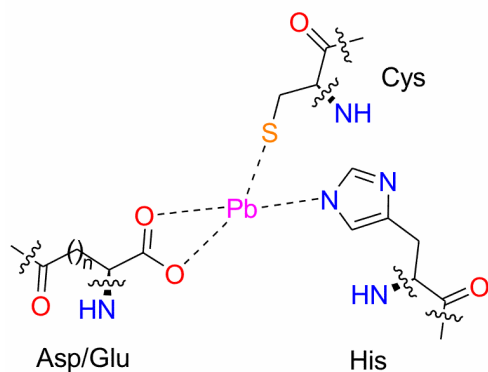

**Class III**  
For eg: PDB ID-1QR7

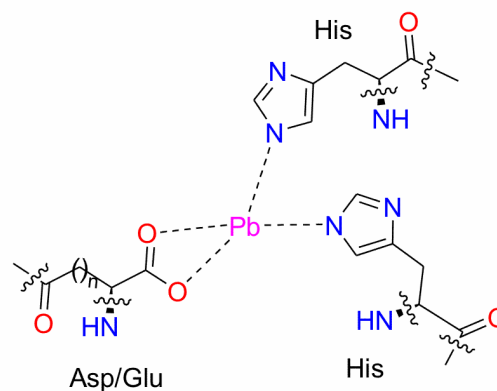

**Class IV:**  
For eg: PDB ID-1KA4

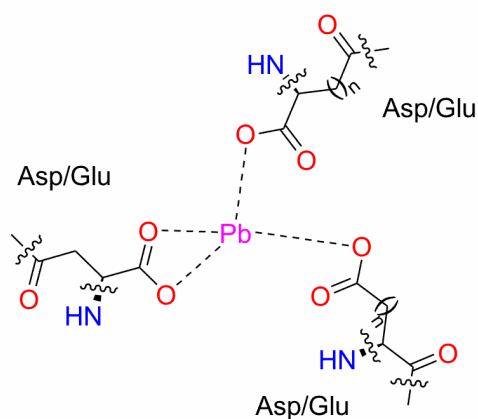

**Class V**  
For eg: PDB ID-1E9N

Pb - Lead

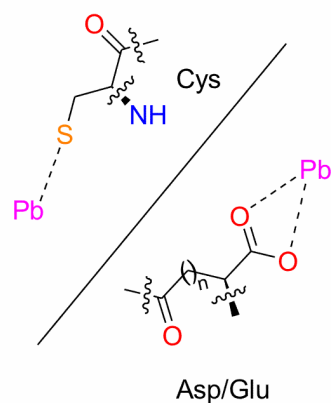

**Class VI:**  
For eg: PDB ID-1AFV,1VoD

**Figure S1:** Six different lead binding patterns of proteins that co-ordinates lead.

### b) GFP chromophore analysis

We utilized the model structure of our GFP variant generated earlier for the copper sensing analysis.<sup>[3]</sup> Using the model structure of our variant, we analyzed the metal binding sites of the GFP variant. We introduced the *in silico* mutation with the amino acids Cys, His, Asp and Glu at the residues such as Phe145, Ser205, Thr203 using the mutagenesis tool of PyMol. The steric clash was determined and analyzed further.

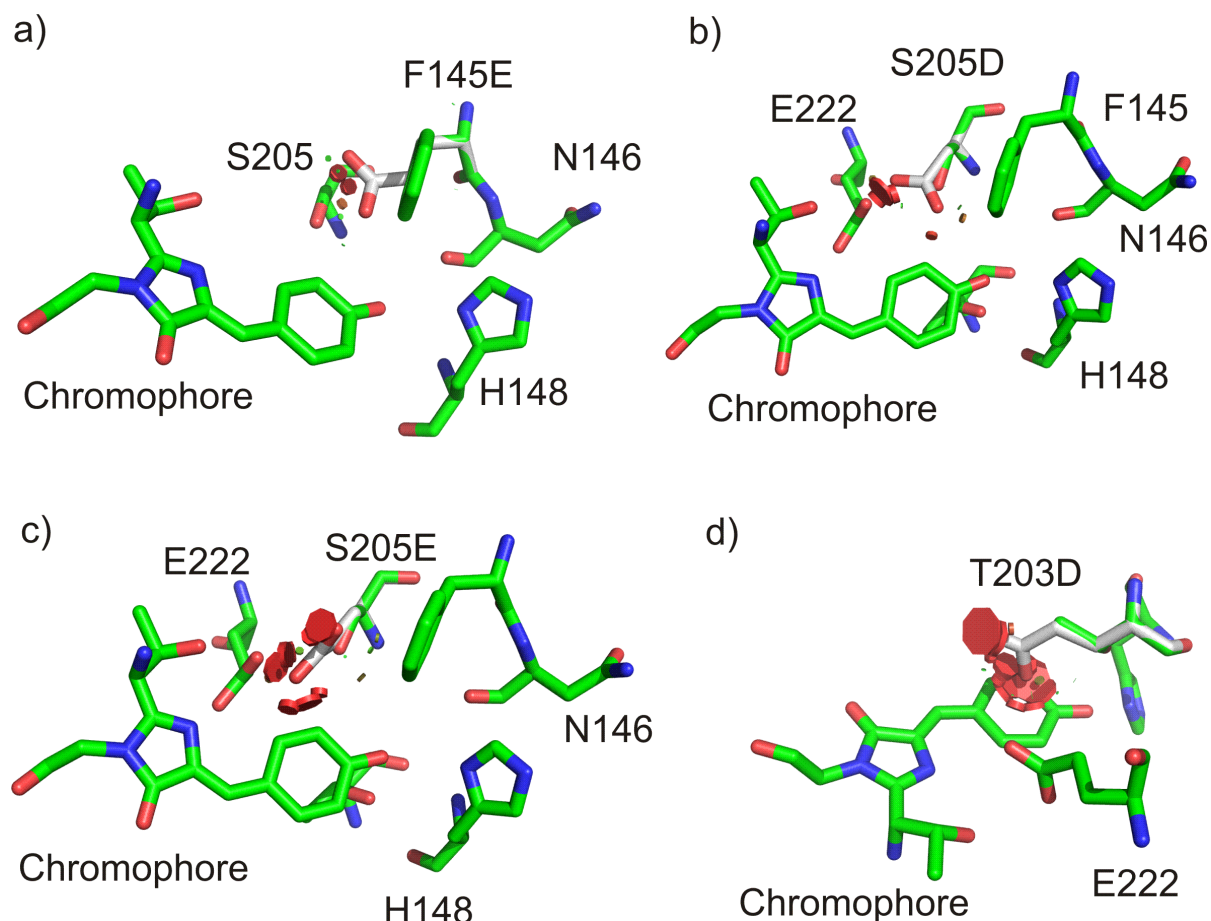

**Figure S2:** Structure of GFP after *in silico* mutagenesis. Carbon atoms of the mutated residues were represented in gray and other represented as green. a) F145E, Glutamic acid replacing phenylalanine steric clash with Ser205. B,C) In the case of S205D and S205E, the D and E sterically hinder the D222 and Y66. D) Similarly in the case of T203D, T203E, the D and E create a steric clash with Y66.

**Table S2:** Possible amino acid mutations near the chromophore that enables the protein without deleterious effect and helps lead binding.

| Protein | Position                      | Replacing Amino acid | Possible Fluorescent variant and metal binding activity |
|---------|-------------------------------|----------------------|---------------------------------------------------------|
| GFP     | F145                          | C                    | Possible mutation                                       |
|         |                               | D                    | Possible mutation                                       |
|         |                               | E                    | Steric hindrance With Tyr66,Ser205                      |
|         |                               | H                    | Possible mutation                                       |
|         | S205                          | C                    | Possible mutation                                       |
|         |                               | D                    | Steric hindrance With Tyr66, and Glu222                 |
|         |                               | E                    | Steric hindrance With Tyr66, and Glu222                 |
|         |                               | H                    | Possible but can't help metal binding.                  |
|         | T203                          | C                    | Possible but not help metal binding                     |
|         |                               | D                    | Steric hindrance                                        |
|         |                               | E                    | Steric hindrance                                        |
|         |                               | H                    | Possible but not help metal binding property            |
|         | Y66<br>(Chromophore tyrosine) | H                    | Unpredictable                                           |

#### 4. Amino acid sequence of GFPHS

MRGSHHHHHHGSMSKGEELFTGVVPILVELDGDVNGHKFSVRGEGEGDATNGKITLKL  
ICTTGKLPVPWPTLVTT**CGY**GVQCFARYPDHMKRHDFFKSAMPEGYVQERTISFKDDG  
TFKTRAEVKFEGDTIVNRIKLKGIDFKEDGNILGHKLEYN**F**NSHKVYITADKQKNGIKAN  
FKIRHNVEDGSLADHYQQNTPIGDGPVRLPDNHYLS**TQS**VILEDPNKRDMVLHEF  
VTAAGITHGMDELYK

In this sequence information, 5 amino acids were highlighted in bold red. Cysteine 64, Tyrosine 66, Phenylalanine 145, Threonine 203, and Serine 205.

#### 5. Site directed mutagenesis

Plasmid pQE-80L containing GFP was used for generating different variants such as GFP<sub>S205C,Y66H</sub>, GFP<sub>S205C,F145C</sub>, GFP<sub>S205C,F145D</sub>, GFP<sub>S205C,F145H</sub>. The mutant were generated from the GFP by using Quick-change site directed mutagenesis kit (Stratagene, La Jolla, CA) according to the manufacturer's description in the manual. The mutagenesis was confirmed by DNA sequencing analysis at Cosmo Genetech, Daejeon, South Korea.

**Table S3:** Mutants and its metal sensing property

| Protein                          | C6<br>4 | Y66 | F145 | T203 | S205 | Metal binding        |
|----------------------------------|---------|-----|------|------|------|----------------------|
| Parent GFP                       | C       | Y   | F    | T    | S    | Mercury              |
| GFP <sub>Y66H,S205C</sub>        | C       | H   | F    | T    | C    | Fluorescent loss     |
| GFP <sub>F145C,S205C</sub>       | C       | Y   | C    | T    | C    | Lead and mercury     |
| GFP <sub>F145D,S205C</sub>       | C       | Y   | D    | T    | C    | Copper, Mercury      |
| GFP <sub>F145H,S205C</sub>       | C       | Y   | H    | T    | C    | Mercury              |
| GFP <sub>C64L</sub>              | L       | Y   | F    | T    | S    | Insensitive to metal |
| GFP <sub>C64L,F145C,S205C</sub>  | L       | Y   | C    | T    | C    | Lead and mercury     |
| GFP <sub>C64L,S205C</sub>        | L       | Y   | F    | T    | C    | Mercury              |
| GFP <sub>C64L,F145C,Cs205A</sub> | L       | Y   | C    | T    | A    | Copper and mercury   |

## 6. Protein expression and purification

The *E.coli* BL21 (DE3) containing pQE-80L GFP and variants were expressed in LB medium according to previously described protocols.<sup>[3]</sup> Cells were induced with 1 mM IPTG allowed for 7 h expression. The harvested cells were subjected to centrifugation and stored at -80°C until further use. Briefly, collected cell pellet was suspended in lysis buffer (5 mM imidazole and 50 mM sodium-Phosphate buffer pH 7.4), followed by sonication and centrifuged at 16000 rpm, 4°C for 20 mins. The supernatant was saved as a soluble protein fraction and the pellet was saved as insoluble protein fraction, and analyzed by SDS-PAGE (12% acrylamide gel). The remaining soluble protein fractions were purified by Ni-NTA column chromatography (GE Healthcare Bio-Sciences, Sweden) by standard protocol. Elution fractions were analyzed by SDS-PAGE, and those that were enriched in the desired GFP variants were pooled and dialyzed against 1X phosphate buffered saline. The concentration of protein was quantified using Bradford assay. Fluorescence spectra of GFP variants were recorded on a Perkin Elmer LS-55 fluorescence spectrometer equipped with digital software, Winlab.<sup>[3]</sup>

## 7. Metal binding analysis

Metal ion screening was performed for the protein samples prepared in 20 mM MOPS against 0.1 mM metal. Fluorescent measurements were recorded on a Perkin Elmer LS-55 spectrofluorometer using Winlab software.

## 8. Selectivity study

Stock solutions of heavy metals and metals were prepared of 200 µM and added to GFP variants to a final concentration of 100 µM metal and 1 µM protein. After 1 hour incubation, the fluorescent emission intensity was recorded at 515nm by exciting sample at 430nm using Gemini EM fluorescent micro plate reader (Molecular devices).

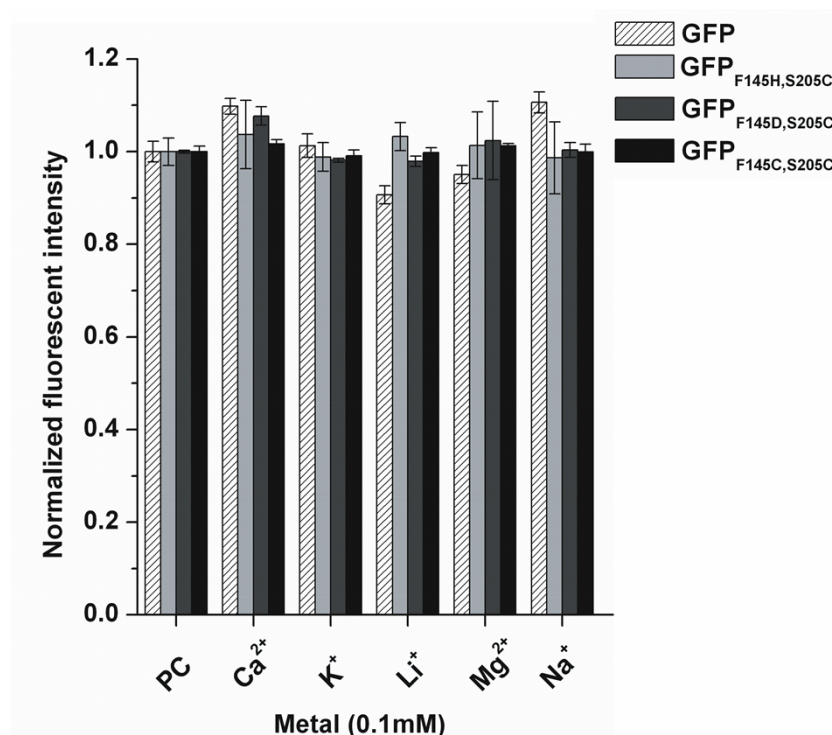

**Figure S3.** Effect of rest of the metals on GFP variants

### 9. Lead titration and identification of dissociation constant

A lead titration experiment was carried to determine the apparent binding constant of the protein. To perform the lead binding study, 100  $\mu$ l of GFP were treated with 100  $\mu$ l of different concentrations of lead solutions. Fluorescence spectra of these solutions were recorded the resulting emission from 515 excited at 505 nm. This experiment was repeated to calculate standard deviations for each. Fluorescence reading was plotted against  $Pb^{2+}$  concentration using the formula mentioned earlier.



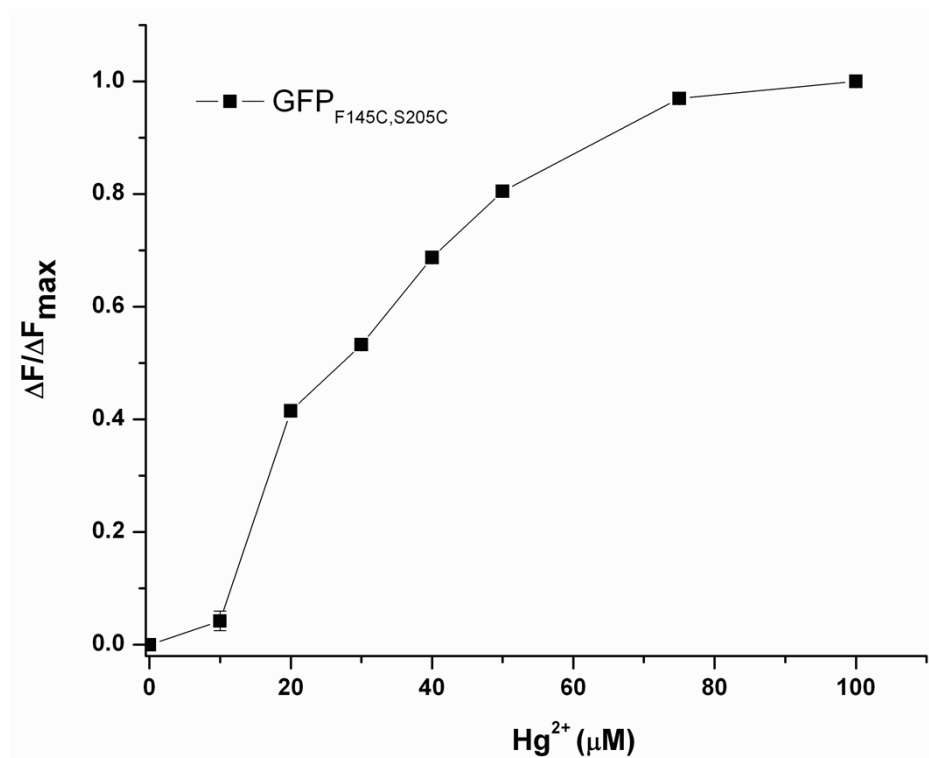

**Fig. S4** Fluorescence quenching of 1 μM GFP<sub>F145C,S205C</sub> in the presence of different concentration of mercury (0-100 μM).

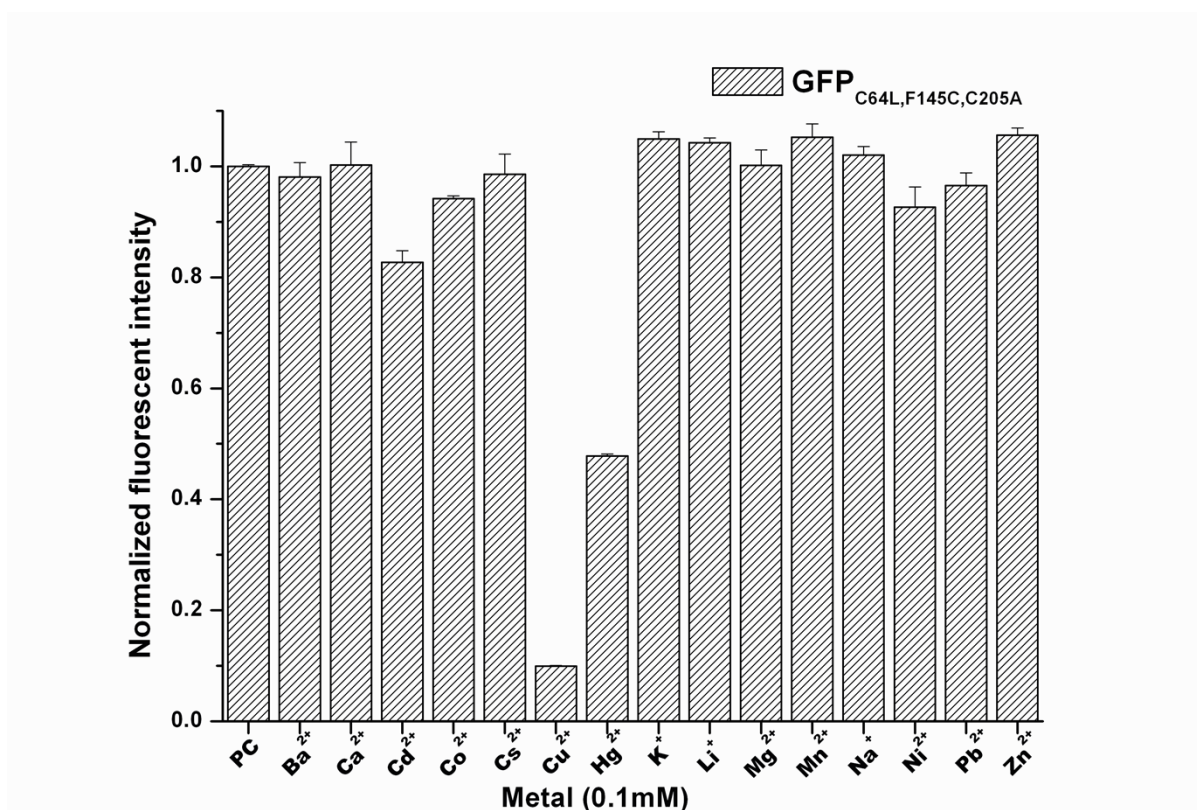

**Fig. S5** Metal screening assay for GFP<sub>C64L,F145C,C205A</sub> in various divalent and monovalent metal.

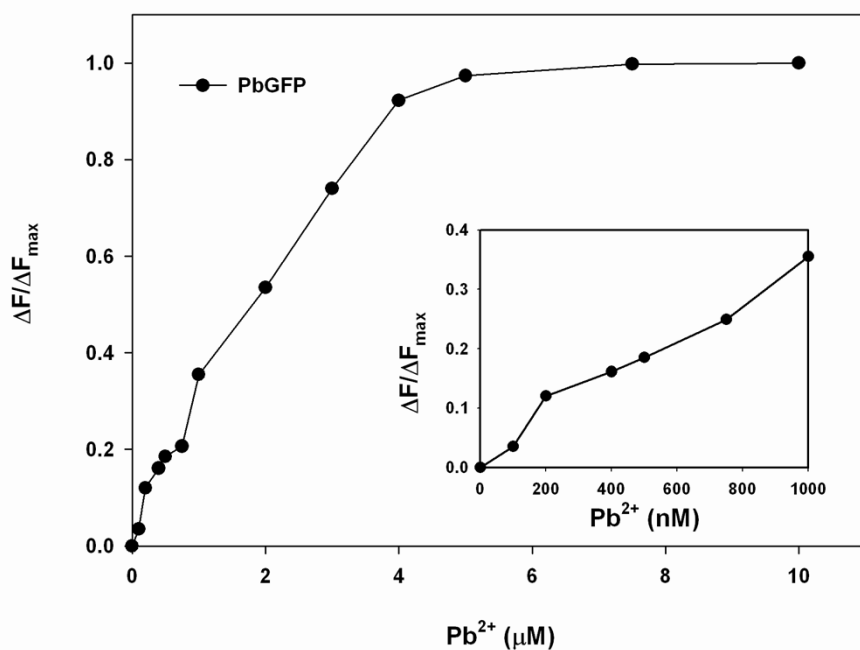

**Fig. S6** Calibration curve for different concentrations of lead in micromolar and nanomolar range against PbGFP.

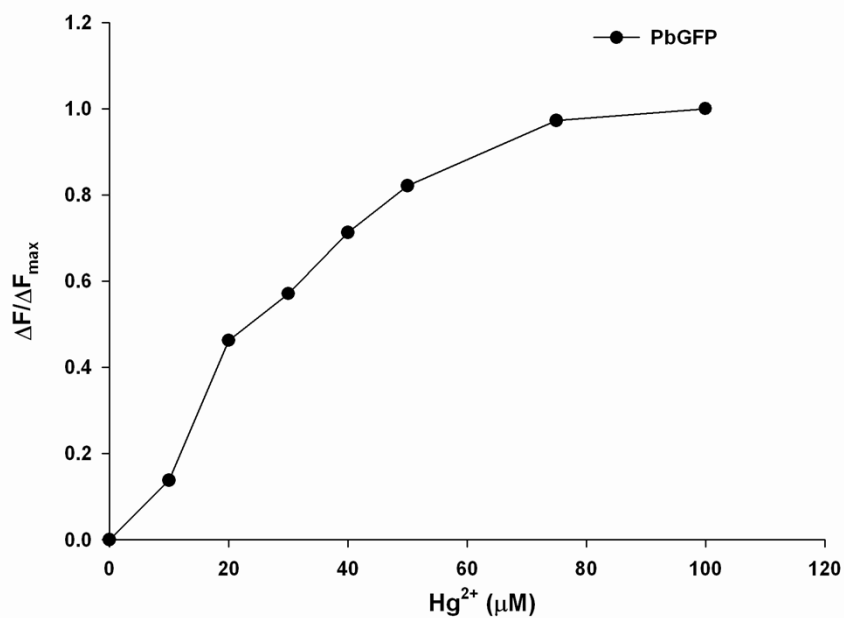

**Fig. S7** Effect of different concentrations of mercury against PbGFP

## 10. Effect of EDTA on the metal binding / detecting the reversibility of the sensor

The reversibility of the sensors was assessed by the addition of 1 mM metal chelator, Ethylene diamine tetra acetic acid (EDTA) to the metal treated GFP variants. In addition, we analyzed the effect of EDTA on the lead and mercury by simultaneous addition of different concentration of EDTA, 100  $\mu$ M metal and 1  $\mu$ M protein

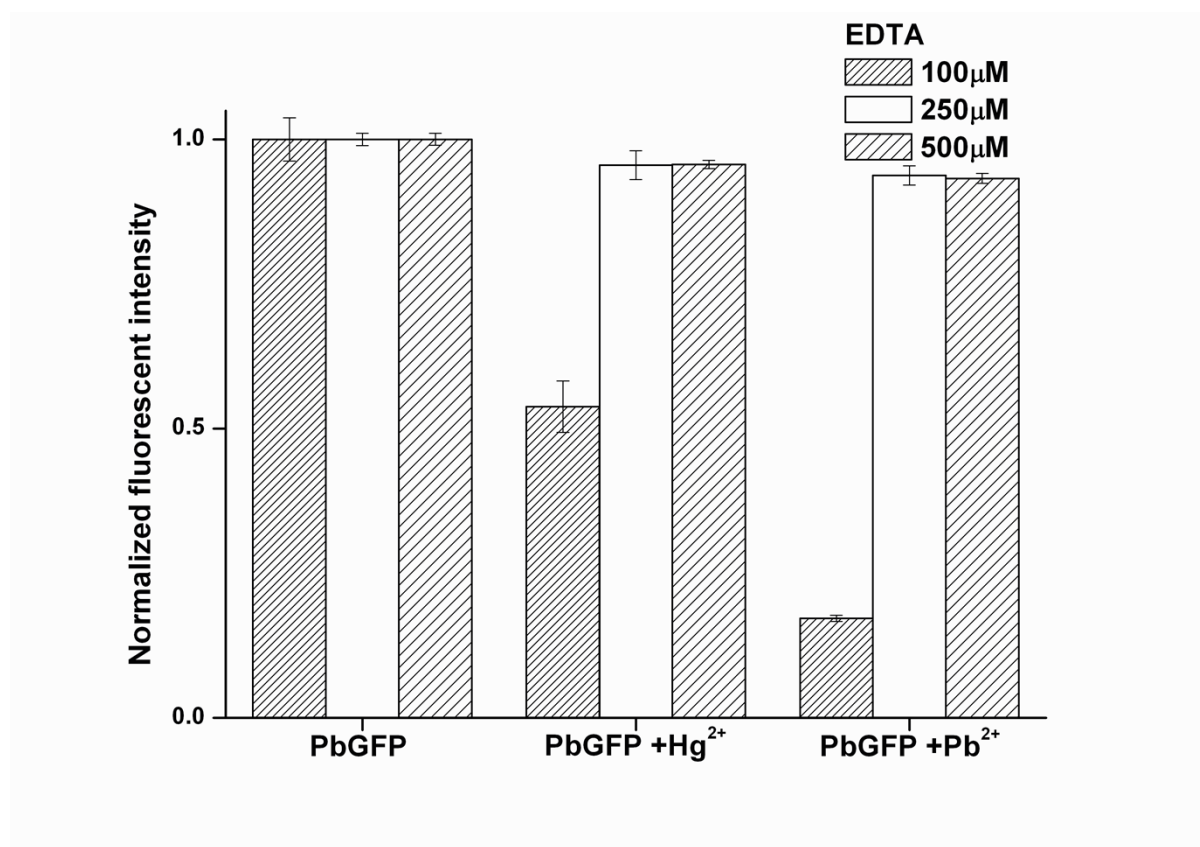

**Fig. S8** Effect of different concentration of EDTA on the fluorescence emission intensity of metal treated PbGFP (GFP<sub>S205C</sub>, F145C, C64L)

## 11. Circular dichroism

A far UV CD spectrum was recorded for the GFP lead sensing variant on a Jasco J-715 spectrophotometer. For the analysis, a volume of 10  $\mu$ M of protein was placed in a 0.2 cm cell and the CD absorption spectrum was obtained at room temperature. A volume of 10  $\mu$ l of 1 mM lead corresponding to final concentration of 10  $\mu$ M was added and the absorbance was recorded. 5 Scans were accumulated per spectrum and raw data was processed using Jasco software package. Finally, the obtained results were analysed and graph was drawn using Origin software.

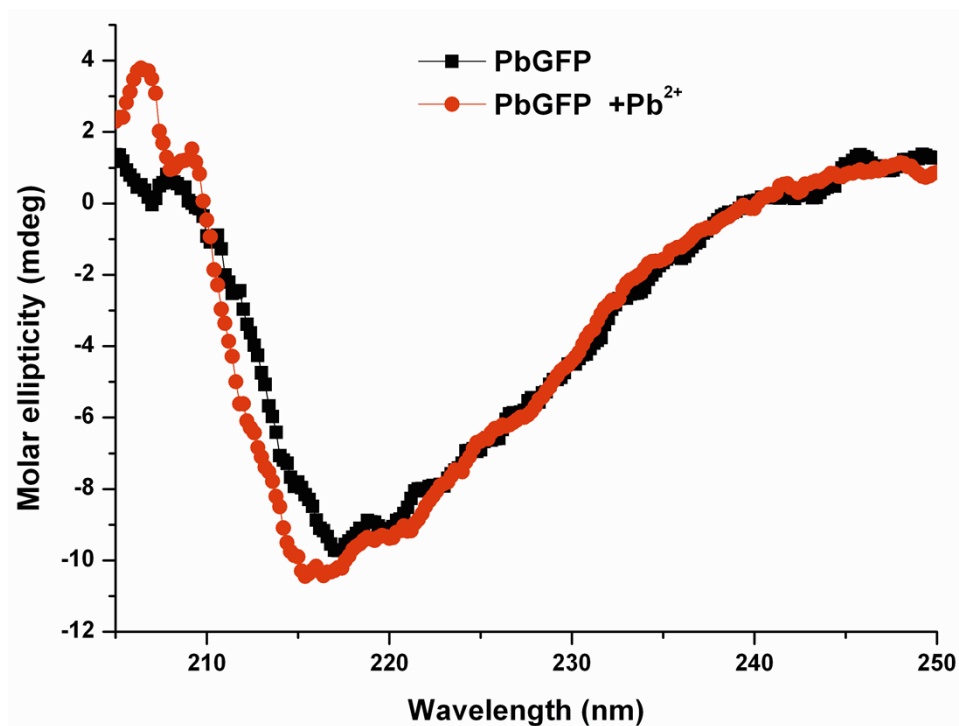

**Fig. S9** CD spectral profile of the PbGFP protein in the presence and absence of  $\text{Pb}^{2+}$

## 12. Effect of pH on the metal binding activity

A wide range of pH buffer was prepared and proteins at 1  $\mu\text{M}$  concentration was prepared at respective buffers and treated with lead. Further the fluorescent intensity of the protein prepared at different pH and metal treated variant at different pH was measured and compared.

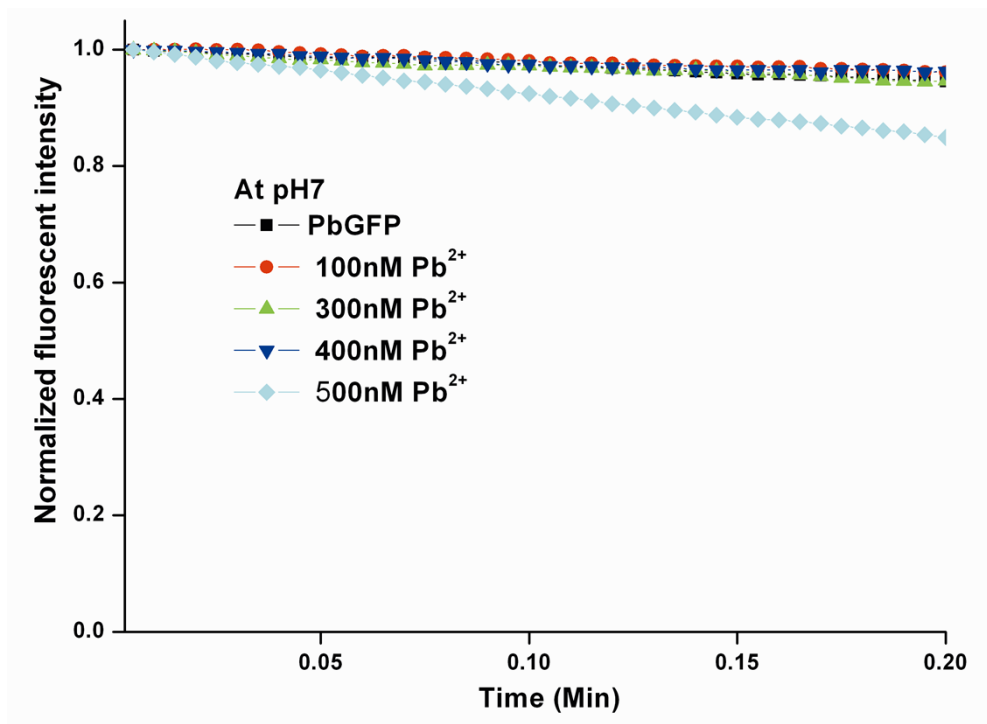

**Fig. S10** Time dependent fluorescence quenching of PbGFP at different concentration range from 100 to 500 nM at pH 7.0

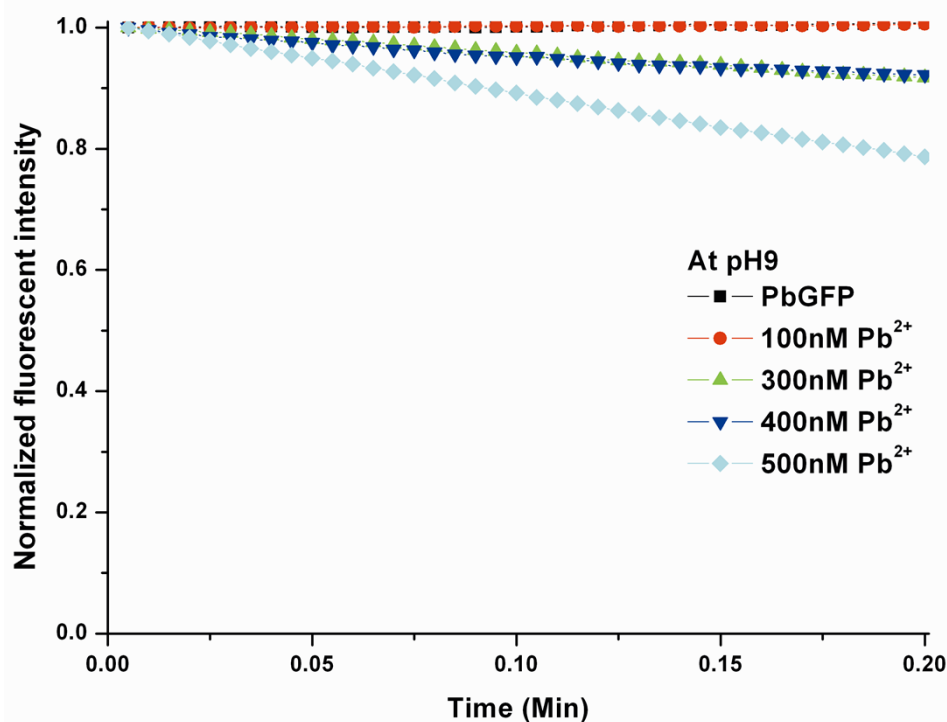

**Fig. S11** Time dependent fluorescence quenching of PbGFP at different concentration range from 100 to 500 nM at pH9.0.

### 13. Bioaccumulation of lead by PbGFP

Metal bioaccumulation assay was performed by culturing the *E.coli* cells in induced and uninduced condition with IPTG. The uninduced *E.coli* cells were utilized as control and the induced *E.coli* cells containing PbGFP were mentioned as PbGFP expressing *E.coli*. Cells were further washed three times with MOPS buffer. Lead nitrate solution was prepared in triple distilled water; 2 OD cells were dissolved in 100  $\mu$ M lead nitrate solution and then kept in a shaking incubator for 2 hours at 200rpm, 25°C. Further, the cells were centrifuged and the supernatant solution was saved and analysed for the residual Pb<sup>2+</sup> using atomic absorption spectroscopy. Further the amount of lead accumulated by the cell was calculated in g/DCW.

### Reference

- [1] J. Sambrook, E. Fritsch, T. Maniatis, Molecular Cloning: A Laboratory Manual. 2nd ed., Cold spring harbor laboratory press, Cold spring harbor, NY, USA, **1989**.
- [2] Schrodinger, LLC, **2010**.
- [3] N. Ayyadurai, N. Saravanan Prabhu, K. Deepankumar, S. G. Lee, H. H. Jeong, C. S. Lee, H. Yun, Angew Chem Int Ed Engl **2011**, 50, 6534-6537.
